# Supplementary material for: Synthesis of C15 and C10 fuel precursors with cyclopentanone and furfural derived from hemicellulose
Source: Royal Society of Chemistry journal article supplement (doi:10.1039/c7ra02396k), 2017-01-01
Supplement: c7ra02396k1.pdf [file c7ra02396k1.pdf]

## Electronic Supplementary Information

### Synthesis of C<sub>15</sub> and C<sub>10</sub> fuel precursors with cyclopentanone and furfural derived from hemicellulose

Wei Wang,<sup>\*a,b</sup> Xiaohui Ji<sup>a</sup>, Hongguang Ge<sup>a</sup>, Zhizhou Li<sup>a</sup>, Guanghui Tian<sup>a</sup>,  
Xianzhao Shao<sup>a</sup> and Qiang Zhang<sup>a</sup>

Shaanxi Key Laboratory of Catalysis, School of Chemistry and Environment Science,  
Shaanxi University of Technology, Hanzhong, 723001, China

\*Corresponding authors:

Dr. Wei Wang; E-mail: wangwei@snut.edu.cn; Tel.: +86 916 2641660.

#### Table of Contents

|                                                                                                                  |    |
|------------------------------------------------------------------------------------------------------------------|----|
| 1. HPLC chromatograms of the products from the reaction of cyclopentanone and furfural over nafion catalyst..... | S2 |
| 2. <sup>1</sup> H and <sup>13</sup> C NMR spectra of 2,5-bis (2-furyl methylidene) cyclopentanone.....           | S3 |
| 3. <sup>1</sup> H and <sup>13</sup> C NMR spectra of 2-(2-furylmethylidene) cyclopentanone.....                  | S4 |

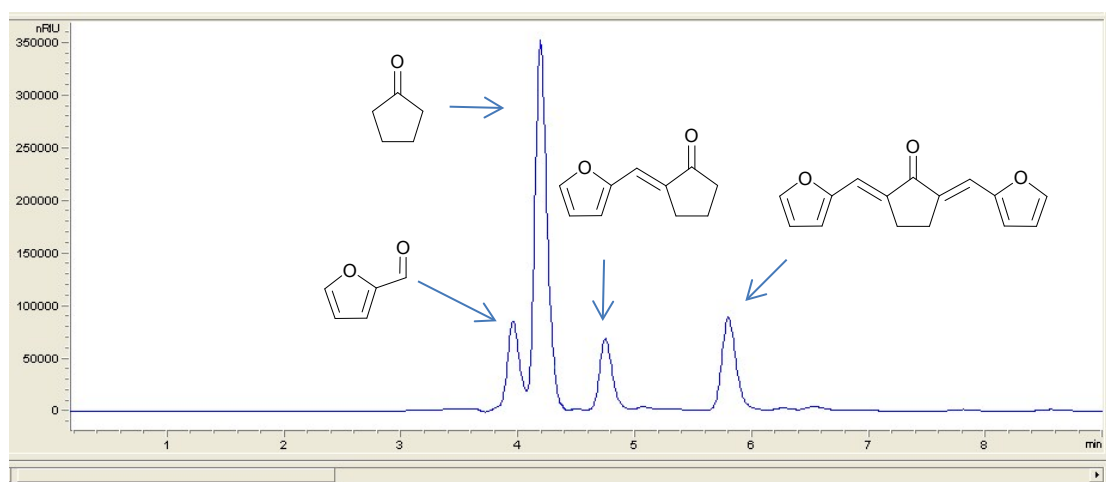

**Fig 1.** HPLC chromatograms of the products from the reaction of cyclopentanone and furfural over nafion catalyst. Reaction conditions: 333 K, 6 h; 1.92 g furfural, 5.04 g cyclopentanone, 0.4 g Raney metal.

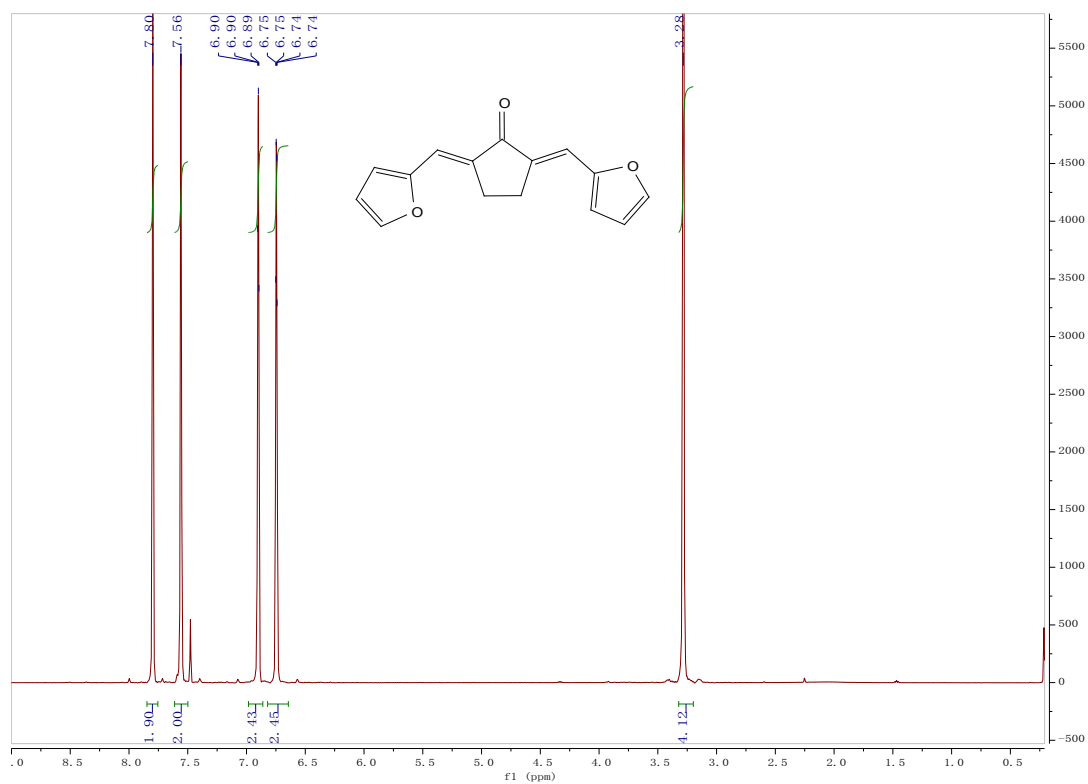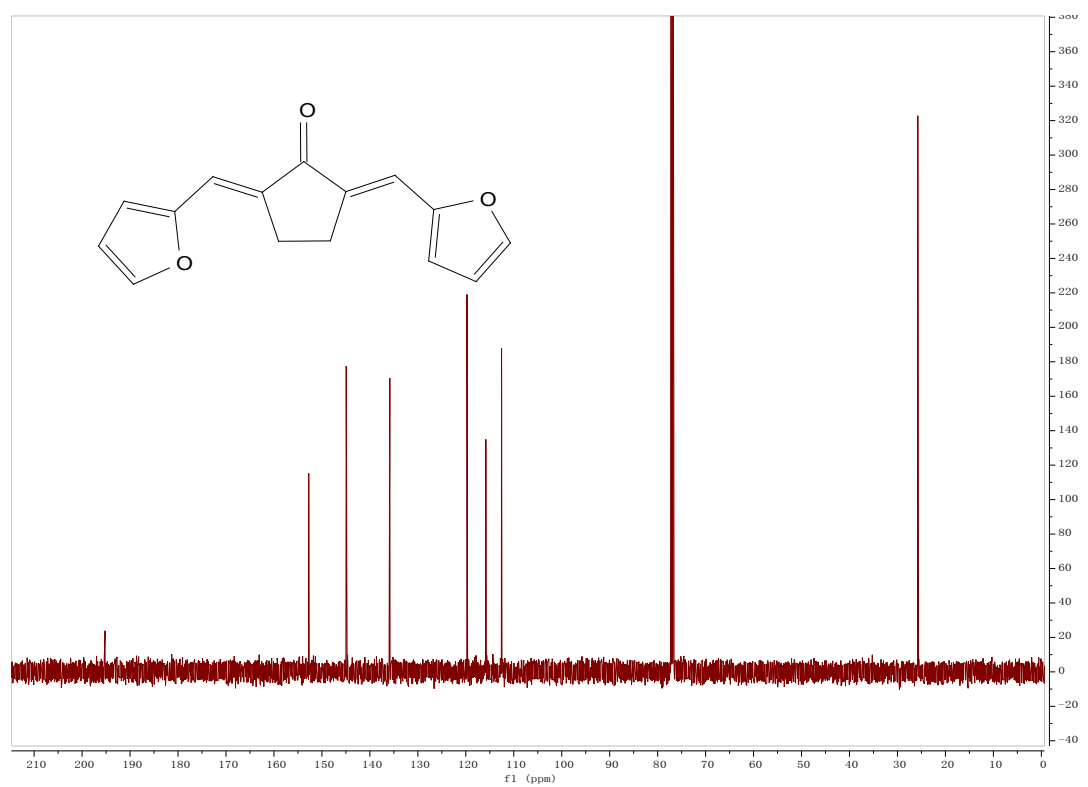

**Fig 2.**  $^1\text{H}$  and  $^{13}\text{C}$  NMR spectra of 2,5-bis (2-furylmethylidene) cyclopentan- 1-one obtained from the reaction of cyclopentanone and furfural.

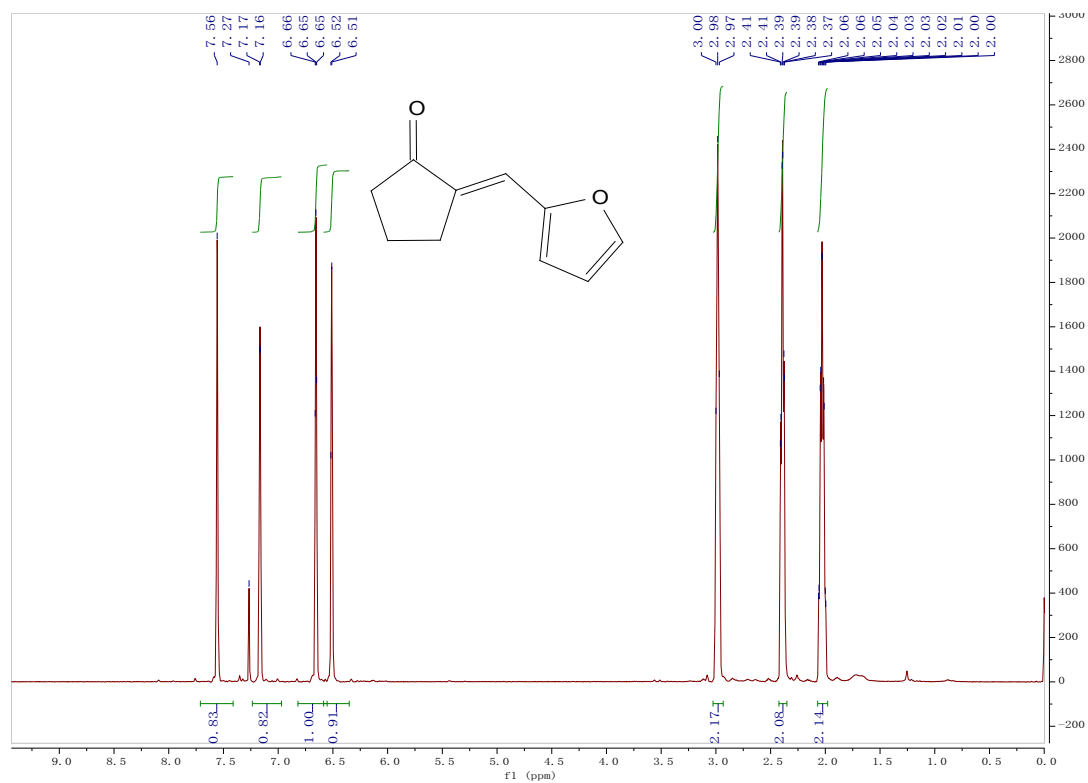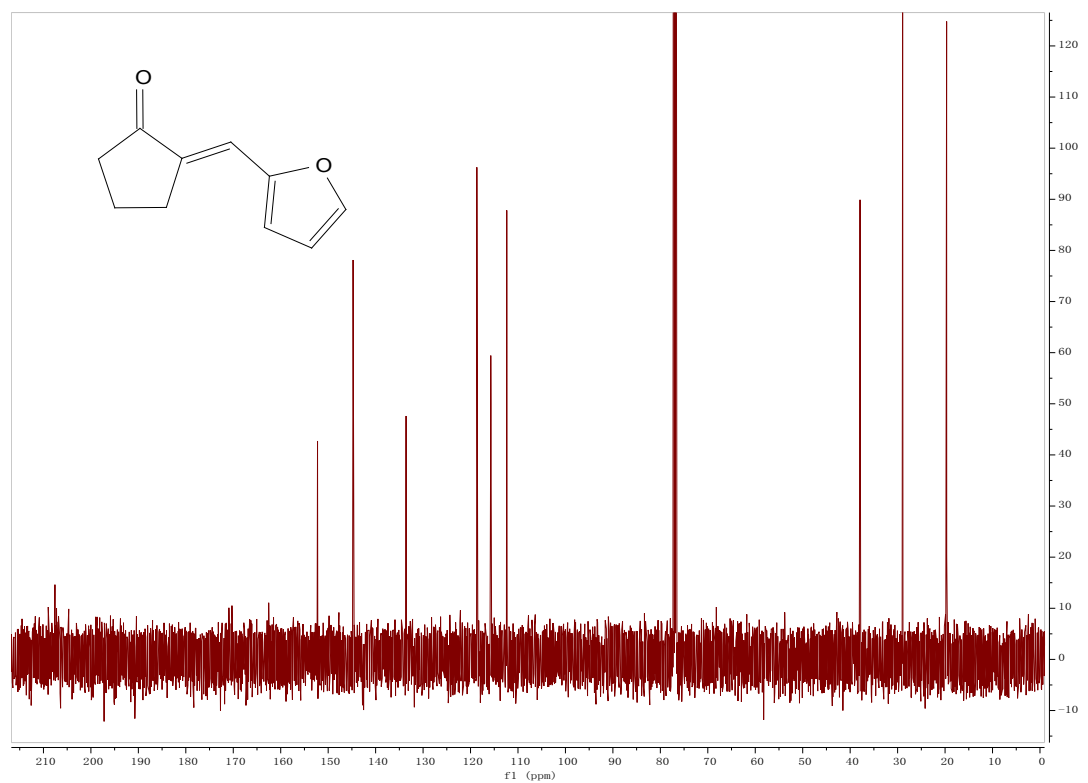

**Fig 3.** <sup>1</sup>H and <sup>13</sup>C NMR spectra of 2-(2-furylmethylidene) cyclopentan-1-one obtained from the reaction of cyclopentanone and furfural.
